# Supplementary material for: Hedgehog-induced-oxidative-phosphorylation rescues neuronal differentiation defect of human enteric neural crest cells underlying Hirschsprung disease
Source: Research Square preprint supplement (doi:10.21203/rs.3.rs-1433241/v1), 2022-04-08
Supplement: Supplementary file 3 [file 4befaf1c3c0f34b18f757fb5.xlsx]

## Sheet: top AS events
Supplementary Data 5. Top AS events contributed to PC2 in Fig. 4e.
			Percent spliced in (PSI)
AS event	ID	Gene	Control	S-HSCR	L-HSCR	Type	Detail	Exon(s)	#	Correlation with PTBP1 Ex9	Putative target of PTBP1 Ex9
ENSG00000011304.22;SE:chr19:805187-805492:805569-806408:+	ENSG00000011304	PTBP1	0.32	0.341	0.552	SE	Cassettes	Ex9	PTBP1 (1)	NA	NO
ENSG00000011304.22;AF:chr19:797075:797505-799413:798428:798545-799413:+	ENSG00000011304	PTBP1	0.434463	0.444092	0.710191	AF	Alternative first exon	Ex1	PTBP1 (2)	NA	NO
ENSG00000011304.22;RI:chr19:804292:804438-804541:804702:+	ENSG00000011304	PTBP1	0.258716	0.404593	0.535764	RI	Intron retention	Ex5,6	PTBP1 (3)	NA	NO
ENSG00000011304.22;AF:chr19:797490:797505-799413:798428:798545-799413:+	ENSG00000011304	PTBP1	0.0402663	0.0666667	0.221993	AF	Alternative first exon	Ex1	PTBP1 (4)	NA	NO
ENSG00000011304.22;SE:chr19:805187-805832:805902-806408:+	ENSG00000011304	PTBP1	0.0645148	0.0303421	0.000828007	SE	Cassettes	Ex9.5	PTBP1 (5)	NA	NO
ENSG00000011304.22;MX:chr19:805187-805492:805569-806408:805187-805832:805902-806408:+	ENSG00000011304	PTBP1	0.961853	0.978431	0.999524	MX	Mutually exclusive cassettes	Ex9.5	PTBP1 (6)	NA	NO
ENSG00000011304.22;SE:chr19:805569-805832:805902-806408:+	ENSG00000011304	PTBP1	0.0346367	0.0133071	0.000267231	SE	Cassettes	Ex9.5	PTBP1 (7)	NA	NO
ENSG00000011304.22;AF:chr19:797452:797505-799413:798428:798545-799413:+	ENSG00000011304	PTBP1	0.970092	0.985944	0.987247	AF	Alternative first exon	Ex1	PTBP1 (8)	NA	NO
ENSG00000023191.17;AF:chr11:504996-506078:506356:504996-507113:507218:-	ENSG00000023191	RNH1	0.809289	0.673456	0.425279	AF	Alternative first exon	Ex11,13	RNH1 (1)	-0.12821	NO
ENSG00000065268.11;SE:chr19:992121-994020:994088-994213:+	ENSG00000065268	WDR18	0.836526	0.820844	0.80834	SE	Cassettes	Ex9	WDR18 (1)	0.254848	YES
ENSG00000147853.17;SE:chr9:4719307-4722506:4722625-4740937:-	ENSG00000147853	AK3	0.602081	0.639146	0.695197	SE	Cassettes	Ex4	AK3 (1)	0.363562	YES
ENSG00000174775.17;RI:chr11:532242:532522-532631:532755:-	ENSG00000174775	HRAS	0.0703077	0.0589849	0.0314918	RI	Intron retention	Ex1,2	HRAS (1)	0.211714	YES
ENSG00000174775.17;SE:chr11:532755-533277:533358-533453:-	ENSG00000174775	HRAS	0.183306	0.175571	0.115861	SE	Cassettes	Ex3	HRAS (2)	-0.440007	YES
ENSG00000101557.15;SE:chr18:163453-166787:166819-178933:+	ENSG00000101557	USP14	0.249397	0.266029	0.450565	SE	Cassettes	Ex3	USP14 (1)	-0.430895	YES
ENSG00000101557.15;SE:chr18:166819-178933:179037-180236:+	ENSG00000101557	USP14	0.499583	0.557177	0.680681	SE	Cassettes	Ex4	USP14 (2)	-0.131898	NO
ENSG00000177030.17;SE:chr11:679816-679978:680074-680963:-	ENSG00000177030	DEAF1	0.0129537	0.0046486	0.00383666	SE	Cassettes	Ex8	DEAF1 (1)	-0.0661514	NO
ENSG00000177030.17;SE:chr11:644654-651162:651407-653962:-	ENSG00000177030	DEAF1	0.0120074	0.0183598	0.0861397	SE	Cassettes	Ex3	DEAF1 (2)	-0.36262	YES
ENSG00000177030.17;SE:chr11:674783-678694:678822-679688:-	ENSG00000177030	DEAF1	0.874986	0.886885	0.994852	SE	Cassettes	Ex6	DEAF1 (3)	-0.140048	NO
ENSG00000177030.17;SE:chr11:679816-679978:680074-680963:-	ENSG00000177030	DEAF1	0.0529537	0.0046486	0.00383666	SE	Cassettes	Ex8	DEAF1 (4)	-0.0661514	NO
ENSG00000099804.9;AF:chr19:536953:537147-541339:541217:541252-541339:+	ENSG00000099804	CDC34	0.4	0.333333	0.122328	AF	Alternative first exon	Ex4,5	CDC34 (1)	-0.150945	NO
ENSG00000132199.20;SE:chr18:690631-691068:691106-693882:-	ENSG00000132199	ENOSF1	0.0754048	0.187881	0.286394	SE	Cassettes	Ex11	ENOSF1 (1)	0.0770848	NO
ENSG00000070423.18;RI:chr19:648882:648975-649679:649748:-	ENSG00000070423	RNF126	0.0200785	0.0197975	0.00560146	RI	Intron retention	Ex3,4	RNF126 (1)	-0.201231	YES
ENSG00000185627.18;MX:chr11:237144-238998:239076-244161:237144-244041:244075-244161:+	ENSG00000185627	PSMD13	0.804055	0.811106	0.885331	MX	Mutually exclusive cassettes	Ex2,3	PSMD13 (1)	0.357511	YES
ENSG00000185627.18;SE:chr11:237144-244041:244075-244161:+	ENSG00000185627	PSMD13	0.809783	0.706357	0.522135	SE	Cassettes	Ex3	PSMD13 (2)	-0.237289	YES
ENSG00000172785.18;AF:chr9:164037-165983:167605:164037-172081:172172:-	ENSG00000172785	CBWD1	0.577626	0.615337	0.922159	AF	Alternative first exon	Ex16,17	CBWD1 (1)	0.262745	YES
ENSG00000172785.18;MX:chr9:146158-150642:150725-152034:146158-151305:151427-152034:-	ENSG00000172785	CBWD1	0.307972	0.252867	0.0622269	MX	Mutually exclusive cassettes	Ex7,8	CBWD1 (2)	0.111712	NO
ENSG00000172785.18;SE:chr9:146158-150509:150725-152034:-	ENSG00000172785	CBWD1	0.000811823	0.0104852	0.0104638	SE	Cassettes	Ex7	CBWD1 (3)	-0.298236	YES
ENSG00000172785.18;SE:chr9:146158-150642:150725-152034:-	ENSG00000172785	CBWD1	0.017596	0.0170281	0.000675409	SE	Cassettes	Ex7	CBWD1 (4)	-0.234762	YES
ENSG00000172785.18;SE:chr9:156527-160001:160140-162432:-	ENSG00000172785	CBWD1	0.0280207	0.0174434	0.00240882	SE	Cassettes	Ex12	CBWD1 (5)	-0.444955	YES
ENSG00000172270.22;SE:chr19:571579-579500:579656-580379:+	ENSG00000172270	BSG	0.664169	0.678384	0.7827	SE	Cassettes	Ex5	BSG (1)	0.186465	NO
ENSG00000143727.16;SE:chr2:271939-272037:272065-272192:+	ENSG00000143727	ACP1	0.384386	0.299689	0.296006	SE	Cassettes	Ex6	ACP1 (1)	-0.0658242	NO
ENSG00000177600.9;AF:chr11:809984:810357-811597:810398:810497-811597:+	ENSG00000177600	RPLP2	0.491483	0.576411	0.892062	AF	Alternative first exon	Ex1,2	RPLP2 (1)	0.246872	YES
Note: Ex9.5 in PTBP1 is a novel exon between Ex9 and Ex10.
