# Supplementary material for: Hedgehog-induced-oxidative-phosphorylation rescues neuronal differentiation defect of human enteric neural crest cells underlying Hirschsprung disease
Source: Research Square preprint supplement (doi:10.21203/rs.3.rs-1433241/v1), 2022-04-08
Supplement: Supplementary file 4 [file 8c3fe6782d921f41b0b85d43.docx]

Access to raw sequencing data:

[https://www.ncbi.nlm.nih.gov/Traces/study/?acc=PRJNA784249&o=acc_s%3Aa](https://urldefense.com/v3/__https:/www.ncbi.nlm.nih.gov/Traces/study/?acc=PRJNA784249&o=acc_s*3Aa__;JQ!!NLFGqXoFfo8MMQ!r_vzFA68m4C1bY0qJ6n0aWKWTLw4xFjAbbMWBpImGaOUNSqhXAzJP5muO_sc0qyHbwPtMtfdKKxokJChX9U$)
