# Supplementary material for: Hedgehog-induced-oxidative-phosphorylation rescues neuronal differentiation defect of human enteric neural crest cells underlying Hirschsprung disease
Source: Research Square preprint supplement (doi:10.21203/rs.3.rs-1433241/v1), 2022-04-08
Supplement: Supplementary file 5 [file 9396714c4f3bd86efe1746ea.xlsx]

## Sheet: Supplementary Data 4
Supplementary Data 4. Enriched pathways in HSCR associated DEGs and 117 HSCR candidate genes
GO term	Description	P-value	Adjusted P-value	q-value	Gene count	Gene symbol
GO:0014032	neural crest cell development	3.55e-17	4.54e-14	3.31e-14	26	ALX1/FN1/SNAI2/CFL1/GDNF/NRP2/SOX11/ALDH1A2/EDN3/EDNRB/ERBB4/HES1/JAG1/NRG1/NRP1/NRTN/PHACTR4/PHOX2B/RET/SEMA3A/SEMA3C/SEMA3D/SHH/SMO/SOX10/ZEB2
GO:0007409	axonogenesis	1.25e-14	4.58e-12	3.34e-12	58	DPYSL2/FN1/GLI3/MAP1B/NFIB/TUBB3/SPP1/UCHL1/ACTB/AGRN/CNP/DAG1/EFNA2/EFNB2/EPHA4/GDNF/GLI2/MAP1S/NCAM1/POU4F1/PTPRO/S100B/PTPN11/NRP2/EPHA7/ARTN/CDH2/CRMP1/DCC/ERBB2/ETV1/FGF13/GAP43/GFRA1/GFRA2/GFRA3/GFRA4/GRB10/ITGB1/L1CAM/MAPT/NKX2-1/NOTCH1/NRP1/NRTN/NTRK3/PHOX2B/PLXNA1/PLXNB1/PSPN/PTCH1/RET/SEMA3A/SEMA3C/SEMA3D/SHH/SMO/ZEB2
GO:0008380	RNA splicing	1.38e-14	4.7e-12	3.43e-12	58	RBM8A/ALYREF/CASC3/CELF5/CPSF1/CPSF4/DDX39A/DHX8/DHX9/ESRP1/FUS/GEMIN2/GEMIN6/GEMIN7/GTF2F1/HSPA1A/KHSRP/LSM4/LSM5/PCBP1/POLR2L/PPP1R8/PRDX6/PTBP1/PUF60/RBM10/ZCRB1/RBFOX2/SF3B5/RBM20/SON/SNRPD3/PAPOLA/SYMPK/SNRPE/STRAP/RBM4/POLR2A/TGS1/SAP18/POLR2K/POLR2E/POLR2F/SRRM2/SNRPD1/SNRPF/PRPF19/SRSF9/RALY/PPIL3/PRPF39/POLR2B/SNRNP70/SRSF3/RBMX/U2AF2/SNRPB2/ELAVL2
GO:0001755	neural crest cell migration	2.28e-14	7.29e-12	5.31e-12	20	ALX1/FN1/CFL1/GDNF/NRP2/EDN3/EDNRB/ERBB4/NRP1/NRTN/PHACTR4/PHOX2B/RET/SEMA3A/SEMA3C/SEMA3D/SHH/SMO/SOX10/ZEB2
GO:0050768	negative regulation of neurogenesis	1.47e-13	3.44e-11	2.5e-11	43	DLX1/DLX2/GLI3/NOTCH3/NR2F1/SPP1/BCL11A/DYNLT1/EFNB2/EPHA4/HES4/HEY1/IDH2/MEIS1/PTPRO/SOX2/STMN2/TP53/EPHA7/LDLR/SOX11/ASCL1/CRMP1/DCC/DLL1/DLL3/DPYSL3/EDNRB/ERBB4/FGF13/HES1/JAG1/NOTCH1/NRG1/NRG3/NRP1/NTRK3/PHOX2B/SEMA3A/SEMA3C/SEMA3D/SHH/SOX10
GO:0006119	oxidative phosphorylation	2.96e-12	5.07e-10	3.69e-10	28	COX4I1/COX5A/DNAJC15/NDUFA11/NDUFS6/UQCRC1/NDUFS7/COX6B1/NDUFA2/NDUFB5/NDUFS4/UQCRH/NDUFS8/NDUFC1/UQCRHL/COX7A2L/COX7A2/NDUFS5/COX7B/NDUFA5/NDUFA13/NDUFS2/COX8A/NDUFV2/NDUFAB1/UQCRB/UQCC2/MECP2
GO:0007219	Notch signaling pathway	3.1e-11	4.23e-09	3.08e-09	31	DLX1/DLX2/GATA2/NOTCH3/SNAI2/CREBBP/DTX3/EP300/ERH/FBXW7/HEY1/HEY2/KIT/MAML1/MAML2/WDR12/TGFBR2/POSTN/ZNF423/NRARP/PSENEN/ASCL1/DLL1/DLL3/HES1/JAG1/JAG2/NOTCH1/NOTCH2/POFUT1/TGFB2
GO:0000209	protein polyubiquitination	4.82e-05	0.000786471	0.000572963	28	ANAPC11/FBXW11/FBXW7/FZR1/PSMA7/PSMC4/UBA52/UBE2B/UBE2D2/UBE2E2/UBE2G2/UBE2H/UBE2L3/SKP1/PSMA3/PSMD14/PSMA1/PSMC3/PSMC5/PSMD5/PSMA2/PRPF19/UBE2N/UBE2V2/UBE2T/UBE2Q2/UBE2O/TTC3
GO:0050808	synapse organization	9.46e-05	0.00142107	0.00103528	33	MAP1B/ACTB/AGRN/CDC42/CFL1/CHRNB1/DAG1/EFNB2/EPHA4/GDNF/GLRB/GPC4/MEF2C/PFN1/POU4F1/PTPRO/LRRN3/WASL/PDZRN3/NRP2/LRP8/EPHA7/MECP2/CDH2/ERBB2/ERBB4/GAP43/L1CAM/MAPT/NRG1/NRP1/NTRK3/PLXNB1
GO:0071103	DNA conformation change	0.00299726	0.0206465	0.0150414	24	RFC3/CENPH/CHD4/CHD7/CHD9/CTCF/DHX9/HAT1/HMGA1/MCM7/NASP/PARP1/RAD51/RBBP7/TOP2A/TP53/UBA52/GRWD1/TOP1/HMGB1/MNAT1/RUVBL2/NAV2/TREX1
GO:0016570	histone modification	0.00844415	0.0302497	0.032237	29	GATA2/SNAI2/ACTL6A/BRCA2/CDC73/CREBBP/CTBP1/CTCF/DPY30/EHMT2/EP300/HAT1/LDB1/PAX7/POLE4/PRDM16/TP53/UBE2B/MIER1/SKP1/FBLL1/RING1/TBL1XR1/SAP30/MECP2/VRK1/RUVBL2/RBM14/UBE2N
GO:0006631	fatty acid metabolic process	0.0107428	0.0326861	0.0383831	25	ACOT1/ACOT2/FADS2/LONP2/ACAT2/ACSL4/ACSM3/ECHS1/FASN/GPX4/MTOR/NDUFS6/ACOT7/NUDT19/ETFA/NDUFAB1/POR/EIF6/LTA4H/MSMO1/INSIG1/PTGES3/PLA2G4C/CBR1/TREX1
GO:0006110	regulation of glycolytic process	0.0130608	0.0414767	0.0447873	8	NUP107/PFKFB1/POM121/TP53/EIF6/NUP62/SEC13/TREX1
