# Supplementary material for: Hedgehog-induced-oxidative-phosphorylation rescues neuronal differentiation defect of human enteric neural crest cells underlying Hirschsprung disease
Source: Research Square preprint supplement (doi:10.21203/rs.3.rs-1433241/v1), 2022-04-08
Supplement: Supplementary file 9 [file 947c3a3847c2098bad3a3b9b.xlsx]

## Sheet: Supplementary Data 3
Supplementary Data 3. Detail information of Integrated genes in PPI network
Gene	Pathway	Gene Set	Genetic evidence
ALDH1A2	neural crest cell development	None	HSCR candidate
ARTN	axonogenesis	None	HSCR candidate
ASCL1	migration	None	HSCR candidate
CBR1	fatty acid metabolic process	None	HSCR candidate
CDH2	axonogenesis	None	HSCR candidate
CRMP1	axonogenesis	None	HSCR candidate
DCC	migration	None	HSCR candidate
DCX	migration	None	HSCR candidate
DLL1	Notch signaling pathway	None	HSCR candidate
DLL3	Notch signaling pathway	None	HSCR candidate
DLX1	Notch signaling pathway	S-HSCR unique	HSCR candidate
DPYSL3	neurogenesis	None	HSCR candidate
EDN3	migration	None	HSCR candidate
EDNRB	neural crest cell development	L-HSCR unique	HSCR candidate
ELAVL2	RNA splicing	None	HSCR candidate
ERBB2	axonogenesis	None	HSCR candidate
ERBB4	neural crest cell development	None	HSCR candidate
ETV1	axonogenesis	None	HSCR candidate
FGF13	migration	None	HSCR candidate
GAP43	axonogenesis	None	HSCR candidate
GDNF	neural crest cell development	L-HSCR unique	HSCR candidate
GFRA1	axonogenesis	None	HSCR candidate
GFRA2	axonogenesis	None	HSCR candidate
GFRA3	migration	None	HSCR candidate
GFRA4	axonogenesis	None	HSCR candidate
GLI2	axonogenesis	L-HSCR unique	HSCR candidate
GLI3	axonogenesis	core gene set	HSCR candidate
GRB10	axonogenesis	None	HSCR candidate
HES1	neural crest cell development	None	HSCR candidate
HLX	neural crest cell development	None	HSCR candidate
IHH	neurogenesis	None	HSCR candidate
ITGB1	axonogenesis	None	HSCR candidate
JAG1	neural crest cell development	None	HSCR candidate
JAG2	Notch signaling pathway	None	HSCR candidate
L1CAM	synapse organization	None	HSCR candidate
MAPT	synapse organization	None	HSCR candidate
NAV2	DNA conformation change	None	HSCR candidate
NKX2-1	migration	None	HSCR candidate
NOTCH1	Notch signaling pathway	None	HSCR candidate
NOTCH2	Notch signaling pathway	None	HSCR candidate
NOTCH3	Notch signaling pathway	core gene set	HSCR candidate
NRG1	neural crest cell development	None	HSCR candidate
NRG3	migration	None	HSCR candidate
NRP1	migration	None	HSCR candidate
NRTN	migration	None	HSCR candidate
NTRK3	migration	None	HSCR candidate
PFKL	glycolysis	None	HSCR candidate
PHACTR4	migration	None	HSCR candidate
PHOX2A	neural crest cell development	None	HSCR candidate
PHOX2B	neural crest cell development	None	HSCR candidate
PLXNA1	axonogenesis	None	HSCR candidate
PLXNB1	synapse organization	None	HSCR candidate
POFUT1	Notch signaling pathway	None	HSCR candidate
PSPN	axonogenesis	None	HSCR candidate
PTCH1	axonogenesis	None	HSCR candidate
RET	neural crest cell development	None	HSCR candidate
SEMA3A	migration	None	HSCR candidate
SEMA3C	migration	None	HSCR candidate
SEMA3D	migration	None	HSCR candidate
SERPINI1	neurogenesis	None	HSCR candidate
SHH	neural crest cell development	None	HSCR candidate
SMO	neural crest cell development	None	HSCR candidate
SON	RNA splicing	core gene set	HSCR candidate
SOX10	neural crest cell development	None	HSCR candidate
SOX2	neurogenesis	L-HSCR unique	HSCR candidate
STMN2	neurogenesis	L-HSCR unique	HSCR candidate
SUFU	neurogenesis	None	HSCR candidate
TGFB2	Notch signaling pathway	None	HSCR candidate
TREX1	glycolysis	None	HSCR candidate
TTC3	ubiquitination	None	HSCR candidate
TUBB3	axonogenesis	core gene set	HSCR candidate
UCHL1	axonogenesis	S-HSCR unique	HSCR candidate
ZEB2	migration	None	HSCR candidate
ACAT2	fatty acid metabolic process	L-HSCR unique	None
ACOT1	fatty acid metabolic process	core gene set	None
ACOT2	fatty acid metabolic process	core gene set	None
ACOT7	fatty acid metabolic process	L-HSCR unique	None
ACSL4	fatty acid metabolic process	L-HSCR unique	None
ACSM3	fatty acid metabolic process	L-HSCR unique	None
ACTB	synapse organization	L-HSCR unique	None
ACTL6A	histone modification	L-HSCR unique	None
ADRM1	ubiquitination	L-HSCR unique	None
AGRN	axonogenesis	L-HSCR unique	None
ALDH2	oxidative phosphorylation	L-HSCR unique	None
ALX1	neural crest cell development	S-HSCR unique	None
ALYREF	RNA splicing	L-HSCR unique	None
ANAPC11	ubiquitination	L-HSCR unique	None
APC	ubiquitination	L-HSCR unique	None
BCL11A	neurogenesis	L-HSCR unique	None
BRCA2	histone modification	L-HSCR unique	None
CASC3	RNA splicing	L-HSCR unique	None
CDC42	synapse organization	L-HSCR unique	None
CDC73	histone modification	L-HSCR unique	None
CELF5	RNA splicing	core gene set	None
CENPH	DNA conformation change	L-HSCR unique	None
CFL1	migration	L-HSCR unique	None
CHD4	DNA conformation change	L-HSCR unique	None
CHD7	DNA conformation change	L-HSCR unique	None
CHD9	DNA conformation change	L-HSCR unique	None
CHRNB1	synapse organization	L-HSCR unique	None
CNP	axonogenesis	L-HSCR unique	None
COX4I1	oxidative phosphorylation	L-HSCR unique	None
COX5A	oxidative phosphorylation	core gene set	None
COX6B1	oxidative phosphorylation	L-HSCR unique	None
COX7A2	oxidative phosphorylation	L-HSCR unique	None
COX7A2L	oxidative phosphorylation	L-HSCR unique	None
COX7B	oxidative phosphorylation	L-HSCR unique	None
COX8A	oxidative phosphorylation	L-HSCR unique	None
CPSF1	RNA splicing	L-HSCR unique	None
CPSF4	RNA splicing	L-HSCR unique	None
CREBBP	histone modification	L-HSCR unique	None
CRX	neurogenesis	L-HSCR unique	None
CTBP1	histone modification	L-HSCR unique	None
CTCF	DNA conformation change	L-HSCR unique	None
CUX1	axonogenesis	L-HSCR unique	None
CYB5A	oxidative phosphorylation	L-HSCR unique	None
DAG1	synapse organization	L-HSCR unique	None
DDX39A	RNA splicing	L-HSCR unique	None
DERL2	ubiquitination	L-HSCR unique	None
DHX8	RNA splicing	L-HSCR unique	None
DHX9	DNA conformation change	L-HSCR unique	None
DLST	oxidative phosphorylation	L-HSCR unique	None
DLX2	Notch signaling pathway	S-HSCR unique	None
DNAJC15	oxidative phosphorylation	core gene set	None
DPY30	histone modification	L-HSCR unique	None
DPYSL2	axonogenesis	S-HSCR unique	None
DPYSL4	axonogenesis	core gene set	None
DTX3	Notch signaling pathway	L-HSCR unique	None
DVL3	neurogenesis	L-HSCR unique	None
DYNLT1	neurogenesis	L-HSCR unique	None
ECHS1	fatty acid metabolic process	L-HSCR unique	None
EFNA2	axonogenesis	L-HSCR unique	None
EFNB2	synapse organization	core gene set	None
EHMT2	histone modification	L-HSCR unique	None
EIF6	glycolysis	L-HSCR unique	None
EP300	histone modification	L-HSCR unique	None
EPHA4	synapse organization	L-HSCR unique	None
EPHA7	synapse organization	L-HSCR unique	None
ERH	Notch signaling pathway	L-HSCR unique	None
ESRP1	neurogenesis	L-HSCR unique	None
ETFA	fatty acid metabolic process	L-HSCR unique	None
FADS2	fatty acid metabolic process	core gene set	None
FASN	fatty acid metabolic process	L-HSCR unique	None
FBLL1	histone modification	L-HSCR unique	None
FBXW11	ubiquitination	L-HSCR unique	None
FBXW7	Notch signaling pathway	L-HSCR unique	None
FLNA	migration	L-HSCR unique	None
FN1	migration	core gene set	None
FRZB	neural crest cell development	core gene set	None
FUS	RNA splicing	L-HSCR unique	None
FZR1	ubiquitination	L-HSCR unique	None
GAS6	migration	L-HSCR unique	None
GATA2	migration	core gene set	None
GEMIN2	RNA splicing	L-HSCR unique	None
GEMIN6	RNA splicing	L-HSCR unique	None
GEMIN7	RNA splicing	L-HSCR unique	None
GFPT1	oxidative phosphorylation	core gene set	None
GLRB	synapse organization	L-HSCR unique	None
GPC2	neurogenesis	L-HSCR unique	None
GPC4	synapse organization	core gene set	None
GPR161	neurogenesis	L-HSCR unique	None
GPX4	fatty acid metabolic process	L-HSCR unique	None
GRWD1	DNA conformation change	L-HSCR unique	None
GTF2F1	RNA splicing	L-HSCR unique	None
HAT1	DNA conformation change	L-HSCR unique	None
HES4	neurogenesis	core gene set	None
HEY1	Notch signaling pathway	L-HSCR unique	None
HEY2	Notch signaling pathway	core gene set	None
HMGA1	DNA conformation change	L-HSCR unique	None
HMGB1	DNA conformation change	L-HSCR unique	None
HSPA1A	oxidative phosphorylation	L-HSCR unique	None
HSPA1B	oxidative phosphorylation	L-HSCR unique	None
IDH2	neurogenesis	L-HSCR unique	None
IDH3G	oxidative phosphorylation	L-HSCR unique	None
INSIG1	fatty acid metabolic process	L-HSCR unique	None
KHSRP	RNA splicing	L-HSCR unique	None
KIT	Notch signaling pathway	L-HSCR unique	None
LDB1	histone modification	L-HSCR unique	None
LDLR	neurogenesis	L-HSCR unique	None
LMO4	neurogenesis	L-HSCR unique	None
LONP2	fatty acid metabolic process	S-HSCR unique	None
LRP8	synapse organization	L-HSCR unique	None
LRRN3	synapse organization	core gene set	None
LSM4	RNA splicing	L-HSCR unique	None
LSM5	RNA splicing	L-HSCR unique	None
LTA4H	fatty acid metabolic process	L-HSCR unique	None
MAD2L1	ubiquitination	L-HSCR unique	None
MAML1	Notch signaling pathway	L-HSCR unique	None
MAML2	Notch signaling pathway	L-HSCR unique	None
MAP1B	migration	S-HSCR unique	None
MAP1S	axonogenesis	L-HSCR unique	None
MCM7	DNA conformation change	L-HSCR unique	None
MDH1	oxidative phosphorylation	L-HSCR unique	None
MDH2	oxidative phosphorylation	L-HSCR unique	None
MECP2	histone modification	L-HSCR unique	None
MEF2C	neural crest cell development	L-HSCR unique	None
MEIS1	neurogenesis	L-HSCR unique	None
MIER1	histone modification	L-HSCR unique	None
MNAT1	DNA conformation change	L-HSCR unique	None
MSMO1	fatty acid metabolic process	L-HSCR unique	None
MTOR	fatty acid metabolic process	L-HSCR unique	None
NASP	DNA conformation change	L-HSCR unique	None
NCAM1	axonogenesis	L-HSCR unique	None
NDUFA11	oxidative phosphorylation	L-HSCR unique	None
NDUFA13	oxidative phosphorylation	L-HSCR unique	None
NDUFA2	oxidative phosphorylation	L-HSCR unique	None
NDUFA5	oxidative phosphorylation	L-HSCR unique	None
NDUFAB1	fatty acid metabolic process	L-HSCR unique	None
NDUFB5	oxidative phosphorylation	L-HSCR unique	None
NDUFC1	oxidative phosphorylation	L-HSCR unique	None
NDUFS2	oxidative phosphorylation	L-HSCR unique	None
NDUFS4	oxidative phosphorylation	L-HSCR unique	None
NDUFS5	oxidative phosphorylation	L-HSCR unique	None
NDUFS6	fatty acid metabolic process	L-HSCR unique	None
NDUFS7	oxidative phosphorylation	L-HSCR unique	None
NDUFS8	oxidative phosphorylation	L-HSCR unique	None
NDUFV2	oxidative phosphorylation	L-HSCR unique	None
NFIB	axonogenesis	core gene set	None
NR2F1	neurogenesis	core gene set	None
NR2F2	migration	core gene set	None
NRARP	Notch signaling pathway	L-HSCR unique	None
NRP2	migration	L-HSCR unique	None
NUDT19	fatty acid metabolic process	L-HSCR unique	None
NUP107	glycolysis	core gene set	None
NUP62	glycolysis	L-HSCR unique	None
PAPOLA	RNA splicing	L-HSCR unique	None
PARP1	DNA conformation change	L-HSCR unique	None
PAX7	histone modification	L-HSCR unique	None
PBK	ubiquitination	L-HSCR unique	None
PCBP1	RNA splicing	core gene set	None
PDZRN3	synapse organization	L-HSCR unique	None
PFKFB1	glycolysis	L-HSCR unique	None
PFN1	synapse organization	L-HSCR unique	None
PHGDH	oxidative phosphorylation	L-HSCR unique	None
PLA2G4C	fatty acid metabolic process	L-HSCR unique	None
POLE4	histone modification	L-HSCR unique	None
POLR2A	RNA splicing	L-HSCR unique	None
POLR2B	RNA splicing	L-HSCR unique	None
POLR2E	RNA splicing	L-HSCR unique	None
POLR2F	RNA splicing	L-HSCR unique	None
POLR2K	RNA splicing	L-HSCR unique	None
POLR2L	RNA splicing	L-HSCR unique	None
POM121	glycolysis	L-HSCR unique	None
POR	fatty acid metabolic process	L-HSCR unique	None
POSTN	Notch signaling pathway	L-HSCR unique	None
POU4F1	synapse organization	L-HSCR unique	None
PPIL3	RNA splicing	L-HSCR unique	None
PPP1R8	RNA splicing	L-HSCR unique	None
PRDM16	histone modification	L-HSCR unique	None
PRDX6	RNA splicing	L-HSCR unique	None
PRPF19	neurogenesis	L-HSCR unique	None
PRPF39	RNA splicing	L-HSCR unique	None
PSENEN	Notch signaling pathway	L-HSCR unique	None
PSMA1	ubiquitination	L-HSCR unique	None
PSMA2	ubiquitination	L-HSCR unique	None
PSMA3	ubiquitination	L-HSCR unique	None
PSMA7	ubiquitination	L-HSCR unique	None
PSMC3	ubiquitination	L-HSCR unique	None
PSMC4	ubiquitination	L-HSCR unique	None
PSMC5	ubiquitination	L-HSCR unique	None
PSMD14	ubiquitination	L-HSCR unique	None
PSMD5	ubiquitination	L-HSCR unique	None
PTBP1	RNA splicing	L-HSCR unique	None
PTGES3	fatty acid metabolic process	L-HSCR unique	None
PTPN11	axonogenesis	L-HSCR unique	None
PTPRO	synapse organization	core gene set	None
PUF60	RNA splicing	L-HSCR unique	None
RAC3	neurogenesis	L-HSCR unique	None
RAD23A	ubiquitination	L-HSCR unique	None
RAD51	DNA conformation change	L-HSCR unique	None
RALY	RNA splicing	L-HSCR unique	None
RBBP7	DNA conformation change	L-HSCR unique	None
RBFOX2	RNA splicing	L-HSCR unique	None
RBM10	RNA splicing	L-HSCR unique	None
RBM14	histone modification	L-HSCR unique	None
RBM20	RNA splicing	L-HSCR unique	None
RBM4	RNA splicing	L-HSCR unique	None
RBM8A	RNA splicing	S-HSCR unique	None
RBMX	RNA splicing	L-HSCR unique	None
RFC3	DNA conformation change	core gene set	None
RHEB	neurogenesis	L-HSCR unique	None
RING1	histone modification	L-HSCR unique	None
RUVBL2	DNA conformation change	L-HSCR unique	None
S100B	axonogenesis	L-HSCR unique	None
SAP18	RNA splicing	L-HSCR unique	None
SAP30	histone modification	L-HSCR unique	None
SEC13	glycolysis	L-HSCR unique	None
SF3B5	RNA splicing	L-HSCR unique	None
SKP1	histone modification	L-HSCR unique	None
SMAD1	ubiquitination	L-HSCR unique	None
SMARCC1	ubiquitination	S-HSCR unique	None
SNAI2	neural crest cell development	S-HSCR unique	None
SNRNP70	RNA splicing	L-HSCR unique	None
SNRPB2	RNA splicing	L-HSCR unique	None
SNRPD1	RNA splicing	L-HSCR unique	None
SNRPD3	RNA splicing	L-HSCR unique	None
SNRPE	RNA splicing	L-HSCR unique	None
SNRPF	RNA splicing	L-HSCR unique	None
SOX11	neural crest cell development	L-HSCR unique	None
SPP1	axonogenesis	S-HSCR unique	None
SRRM2	RNA splicing	L-HSCR unique	None
SRSF3	RNA splicing	L-HSCR unique	None
SRSF9	RNA splicing	L-HSCR unique	None
STRAP	RNA splicing	L-HSCR unique	None
SUMO1	ubiquitination	L-HSCR unique	None
SUMO2	ubiquitination	L-HSCR unique	None
SYMPK	RNA splicing	L-HSCR unique	None
SYT1	neurogenesis	L-HSCR unique	None
TBL1XR1	histone modification	L-HSCR unique	None
TCF12	neurogenesis	S-HSCR unique	None
TCF3	neurogenesis	L-HSCR unique	None
TGFBR2	Notch signaling pathway	L-HSCR unique	None
TGS1	RNA splicing	L-HSCR unique	None
TOP1	DNA conformation change	L-HSCR unique	None
TOP2A	DNA conformation change	L-HSCR unique	None
TP53	glycolysis	L-HSCR unique	None
TRIM28	histone modification	L-HSCR unique	None
U2AF2	RNA splicing	L-HSCR unique	None
UBA52	DNA conformation change	L-HSCR unique	None
UBE2B	histone modification	L-HSCR unique	None
UBE2D2	ubiquitination	L-HSCR unique	None
UBE2E2	ubiquitination	L-HSCR unique	None
UBE2G2	ubiquitination	L-HSCR unique	None
UBE2H	ubiquitination	core gene set	None
UBE2L3	ubiquitination	L-HSCR unique	None
UBE2N	histone modification	L-HSCR unique	None
UBE2O	ubiquitination	L-HSCR unique	None
UBE2Q2	ubiquitination	L-HSCR unique	None
UBE2T	ubiquitination	L-HSCR unique	None
UBE2V2	ubiquitination	L-HSCR unique	None
UBQLN1	ubiquitination	L-HSCR unique	None
UBXN1	ubiquitination	L-HSCR unique	None
UQCC2	oxidative phosphorylation	L-HSCR unique	None
UQCRB	oxidative phosphorylation	L-HSCR unique	None
UQCRC1	oxidative phosphorylation	L-HSCR unique	None
UQCRH	oxidative phosphorylation	L-HSCR unique	None
UQCRHL	oxidative phosphorylation	L-HSCR unique	None
USP10	ubiquitination	L-HSCR unique	None
USP14	ubiquitination	L-HSCR unique	None
VRK1	histone modification	L-HSCR unique	None
WASL	synapse organization	L-HSCR unique	None
WDR12	Notch signaling pathway	L-HSCR unique	None
XRCC2	neurogenesis	S-HSCR unique	None
YY1	ubiquitination	L-HSCR unique	None
ZCRB1	RNA splicing	L-HSCR unique	None
ZNF423	Notch signaling pathway	L-HSCR unique	None
